# Supplementary material for: Edge engineering on layered WS2 toward the electrocatalytic reduction of CO2: a first principles study
Source: Royal Society of Chemistry journal article supplement (doi:10.1039/d2cp03499a), 2022-01-01
Supplement: d2cp03499a1.pdf [file d2cp03499a1.pdf]

## Supporting information

### Edge engineering on layered WS<sub>2</sub> toward the electrocatalytic reduction of CO<sub>2</sub>: a first principles study

Likai Tong <sup>a</sup>, Bo Zhang <sup>a</sup>, Yu Zhang <sup>a</sup>, Zhijian Peng <sup>b</sup> and Xiuli Fu <sup>a,\*</sup>

<sup>a</sup> *State Key Laboratory of Information Photonics and Optical Communications, and School of Integrated Circuits, Beijing University of Posts and Telecommunications, Beijing 100876, P. R.*

*China*

<sup>b</sup> *School of Science, China University of Geosciences, Beijing 100083, P.R. China*

\*Corresponding author:

Xiuli Fu (xiulifu@bupt.edu.cn).

**Table S1** DFT calculated energy, zero-point energy, entropy, and Gibbs free energy of the gas phase molecules considered in this work

| Molecule         | E/eV   | ZPE/eV | -TS/eV | G/eV   |
|------------------|--------|--------|--------|--------|
| CO <sub>2</sub>  | -22.95 | 0.31   | -0.66  | -23.30 |
| CO               | -14.77 | 0.13   | -0.61  | -15.25 |
| H <sub>2</sub> O | -14.22 | 0.58   | -0.67  | -14.31 |
| H <sub>2</sub>   | -6.77  | 0.27   | -0.40  | -6.90  |

Here, the Gibbs free energy change of intermediates are given by **Equations S1 and S2**:<sup>1</sup>

$$\Delta G(\text{COOH}^*) = G(\text{COOH}^*) - G^* - G(\text{CO}_2) - 1/2G(\text{H}_2) + \Delta G(\text{PH}) \quad (\text{S1})$$

$$\Delta G(\text{CO}^*) = G(\text{CO}^*) + G(\text{H}_2\text{O}) - G^* - G(\text{CO}_2) - G(\text{H}_2) + \Delta G(\text{PH}) \quad (\text{S2})$$

The solvation correction is given by **Equations S3 and S4**:

$$\Delta G_{\text{corr}}(\text{COOH}^*) = \Delta G(\text{COOH}^*) + \Delta E_{\text{sol}}(\text{COOH}) \quad (\text{S3})$$

$$\Delta G_{\text{corr}}(\text{CO}^*) = \Delta G(\text{CO}^*) + \Delta E_{\text{sol}}(\text{CO}) \quad (\text{S4})$$

The solvation correction to adsorbate energy could be applied to both COOH\* (-0.25 eV) and CO\* (-0.1 eV).<sup>2</sup>

**Table S2** DFT calculated cohesive energy of different models

| Models              | $\Delta G(\text{COOH}^*)/\text{eV}$ | $\Delta G(\text{CO}^*)/\text{eV}$ |
|---------------------|-------------------------------------|-----------------------------------|
| WS <sub>2</sub> -3W | -0.75                               | -1.15                             |
| WS <sub>2</sub> -4W | -0.70                               | -1.19                             |

We compared the semi-infinite strip model with 3 W atoms (WS<sub>2</sub>-3W) in a direction with the semi-infinite strip model with 4 W atoms (WS<sub>2</sub>-4W) in a direction. The calculated values of  $\Delta G(\text{COOH}^*)$  and  $\Delta G(\text{CO}^*)$  show that the WS<sub>2</sub>-3W model is similar to the previous studies in literature.<sup>3, 4</sup> In the WS<sub>2</sub>-3W model, the distance between the adsorption intermediate of adjacent lattices is 9.54 Å, which can avoid the contact between the adjacent lattices.

**Table S3** DFT calculated cohesive energy of different models

| Models               | cohesive energy (eV/atom) |
|----------------------|---------------------------|
| WS <sub>2</sub>      | 5.56                      |
| WS <sub>2</sub> -1Zn | 5.39                      |
| WS <sub>2</sub> -2Zn | 5.17                      |
| WS <sub>2</sub> -3Zn | 4.96                      |
| WS <sub>2</sub> -1Fe | 5.49                      |
| WS <sub>2</sub> -2Fe | 5.41                      |
| WS <sub>2</sub> -3Fe | 5.33                      |
| WS <sub>2</sub> -1Co | 5.52                      |
| WS <sub>2</sub> -2Co | 5.46                      |
| WS <sub>2</sub> -3Co | 5.39                      |
| WS <sub>2</sub> -1Ni | 5.52                      |
| WS <sub>2</sub> -2Ni | 5.47                      |
| WS <sub>2</sub> -3Ni | 5.41                      |

**Table S4** DFT calculated adsorption energy of the intermediates COOH and CO onto different models

| Models                 | Concentration | Adsorption site | $\Delta E_{ads}(COOH^*)/eV$ | $\Delta E_{ads}(CO^*)/eV$ |
|------------------------|---------------|-----------------|-----------------------------|---------------------------|
| WS <sub>2</sub>        | 0             | W               | -4.17                       | -2.45                     |
| WS <sub>2</sub> -1Zn-1 | 1/3           | W               | -3.79                       | -2.49                     |
| WS <sub>2</sub> -1Zn-2 | 1/3           | Zn              | -1.78                       | -0.22                     |
| WS <sub>2</sub> -2Zn-1 | 2/3           | W               | -3.79                       | -1.80                     |
| WS <sub>2</sub> -2Zn-2 | 2/3           | Zn              | -1.91                       | -0.23                     |
| WS <sub>2</sub> -3Zn-2 | 1             | Zn              | -1.89                       | -0.39                     |
| WS <sub>2</sub> -1Fe-1 | 1/3           | W               | -3.98                       | -2.81                     |
| WS <sub>2</sub> -1Fe-2 | 1/3           | Fe              | -2.59                       | -2.01                     |
| WS <sub>2</sub> -2Fe-1 | 2/3           | W               | -4.11                       | -2.22                     |
| WS <sub>2</sub> -2Fe-2 | 2/3           | Fe              | -2.66                       | -2.24                     |
| WS <sub>2</sub> -3Fe-2 | 1             | Fe              | -2.50                       | -1.78                     |
| WS <sub>2</sub> -1Co-1 | 1/3           | W               | -3.99                       | -2.14                     |
| WS <sub>2</sub> -1Co-2 | 1/3           | Co              | -2.58                       | -1.76                     |
| WS <sub>2</sub> -2Co-1 | 2/3           | W               | -4.02                       | -2.04                     |
| WS <sub>2</sub> -2Co-2 | 2/3           | Co              | -2.66                       | -1.92                     |
| WS <sub>2</sub> -3Co-2 | 1             | Co              | -2.48                       | -2.03                     |
| WS <sub>2</sub> -1Ni-1 | 1/3           | W               | -4.06                       | -2.26                     |
| WS <sub>2</sub> -1Ni-2 | 1/3           | Ni              | -2.35                       | -0.97                     |
| WS <sub>2</sub> -2Ni-1 | 2/3           | W               | -3.99                       | -2.10                     |
| WS <sub>2</sub> -2Ni-2 | 2/3           | Ni              | -2.24                       | -0.93                     |
| WS <sub>2</sub> -3Ni-2 | 1             | Ni              | -2.32                       | -1.22                     |

**Table S5** The calculated Gibbs free energy change at 298.15 K for the adsorption of the intermediates COOH and CO onto different models

| Models                 | Concentration | Adsorption site | $\Delta G(\text{COOH}^*)/\text{eV}$ | $\Delta G(\text{CO}^*)/\text{eV}$ | $\Delta G(\text{H}^*)/\text{eV}$ |
|------------------------|---------------|-----------------|-------------------------------------|-----------------------------------|----------------------------------|
| WS <sub>2</sub>        | 0             | W               | -0.75                               | -1.15                             | -0.47                            |
| WS <sub>2</sub> -1Zn-1 | 1/3           | W               | -0.38                               | -1.19                             | -0.43                            |
| WS <sub>2</sub> -1Zn-2 | 1/3           | Zn              | 1.62                                | 1.05                              | 1.62                             |
| WS <sub>2</sub> -2Zn-1 | 2/3           | W               | -0.37                               | -0.51                             | 0.17                             |
| WS <sub>2</sub> -2Zn-2 | 2/3           | Zn              | 1.50                                | 1.06                              | 0.18                             |
| WS <sub>2</sub> -3Zn-2 | 1             | Zn              | 1.52                                | 0.88                              | 1.75                             |
| WS <sub>2</sub> -1Fe-1 | 1/3           | W               | -0.56                               | -1.50                             | -0.49                            |
| WS <sub>2</sub> -1Fe-2 | 1/3           | Fe              | 0.82                                | -0.69                             | 0.84                             |
| WS <sub>2</sub> -2Fe-1 | 2/3           | W               | -0.68                               | -0.93                             | -0.12                            |
| WS <sub>2</sub> -2Fe-2 | 2/3           | Fe              | 0.75                                | -0.91                             | -0.10                            |
| WS <sub>2</sub> -3Fe-2 | 1             | Fe              | 0.91                                | -0.46                             | 0.93                             |
| WS <sub>2</sub> -1Co-1 | 1/3           | W               | -0.58                               | -0.83                             | -0.43                            |
| WS <sub>2</sub> -1Co-2 | 1/3           | Co              | 0.83                                | -0.43                             | 0.77                             |
| WS <sub>2</sub> -2Co-1 | 2/3           | W               | -0.60                               | -0.75                             | -0.02                            |
| WS <sub>2</sub> -2Co-2 | 2/3           | Co              | 0.75                                | -0.60                             | 0.67                             |
| WS <sub>2</sub> -3Co-2 | 1             | Co              | 0.93                                | -0.71                             | 0.87                             |
| WS <sub>2</sub> -1Ni-1 | 1/3           | W               | -0.65                               | -0.95                             | -0.65                            |
| WS <sub>2</sub> -1Ni-2 | 1/3           | Ni              | 1.06                                | 0.34                              | 1.10                             |
| WS <sub>2</sub> -2Ni-1 | 2/3           | W               | -0.57                               | -0.81                             | 0.04                             |
| WS <sub>2</sub> -2Ni-2 | 2/3           | Ni              | 1.18                                | 0.38                              | 1.14                             |
| WS <sub>2</sub> -3Ni-2 | 1             | Ni              | 1.09                                | 0.09                              | 1.10                             |

**Table S6** Bond lengths in the considered models

| Models                 | Concentration | Adsorption site | COOH*/Å          |                   |                   | CO*/Å            |
|------------------------|---------------|-----------------|------------------|-------------------|-------------------|------------------|
|                        |               |                 | d <sub>M-C</sub> | d <sub>M-O1</sub> | d <sub>M-O2</sub> | d <sub>W-C</sub> |
| WS <sub>2</sub>        | 0             | W               | 2.05             | 2.24              | 3.30              | 2.00             |
| WS <sub>2</sub> -1Zn-1 | 1/3           | W               | 2.04             | 2.19              | 3.31              | 1.92             |
| WS <sub>2</sub> -1Zn-2 | 1/3           | Zn              | 2.04             | 2.94              | 2.83              | 2.11             |
| WS <sub>2</sub> -2Zn-1 | 2/3           | W               | 2.07             | 2.22              | 3.32              | 2.03             |
| WS <sub>2</sub> -2Zn-2 | 2/3           | Zn              | 2.03             | 2.91              | 2.83              | 2.09             |
| WS <sub>2</sub> -3Zn-2 | 1             | Zn              | 2.04             | 2.91              | 2.84              | 2.08             |
| WS <sub>2</sub> -1Fe-1 | 1/3           | W               | 2.03             | 2.18              | 3.30              | 1.91             |
| WS <sub>2</sub> -1Fe-2 | 1/3           | Fe              | 1.91             | 2.65              | 2.89              | 1.74             |
| WS <sub>2</sub> -2Fe-1 | 2/3           | W               | 2.05             | 2.24              | 3.30              | 2.01             |
| WS <sub>2</sub> -2Fe-2 | 2/3           | Fe              | 1.93             | 2.70              | 2.89              | 1.75             |
| WS <sub>2</sub> -3Fe-2 | 1             | Fe              | 1.96             | 2.71              | 2.91              | 1.77             |
| WS <sub>2</sub> -1Co-1 | 1/3           | W               | 2.03             | 2.16              | 3.30              | 2.01             |
| WS <sub>2</sub> -1Co-2 | 1/3           | Co              | 1.92             | 2.81              | 2.78              | 1.75             |
| WS <sub>2</sub> -2Co-1 | 2/3           | W               | 2.06             | 2.23              | 3.30              | 2.03             |
| WS <sub>2</sub> -2Co-2 | 2/3           | Co              | 1.93             | 2.82              | 2.78              | 1.75             |
| WS <sub>2</sub> -3Co-2 | 1             | Co              | 1.92             | 2.74              | 2.83              | 1.74             |
| WS <sub>2</sub> -1Ni-1 | 1/3           | W               | 2.04             | 2.18              | 3.31              | 2.00             |
| WS <sub>2</sub> -1Ni-2 | 1/3           | Ni              | 1.95             | 2.83              | 2.78              | 1.81             |
| WS <sub>2</sub> -2Ni-1 | 2/3           | W               | 2.06             | 2.22              | 3.30              | 2.01             |
| WS <sub>2</sub> -2Ni-2 | 2/3           | Ni              | 1.96             | 2.84              | 2.78              | 1.82             |
| WS <sub>2</sub> -3Ni-2 | 1             | Ni              | 1.95             | 2.82              | 2.76              | 1.81             |

**Table S7** Solvent corrected  $\Delta G_{corr}(COOH^*)$  values (in eV) at different PH in the considered models

| Models                 | PH    |       |       |       |       |       |       |       |       |       |       |       |       |       |       |
|------------------------|-------|-------|-------|-------|-------|-------|-------|-------|-------|-------|-------|-------|-------|-------|-------|
|                        | 0     | 1     | 2     | 3     | 4     | 5     | 6     | 7     | 8     | 9     | 10    | 11    | 12    | 13    | 14    |
| WS <sub>2</sub>        | -1.00 | -0.94 | -0.88 | -0.82 | -0.76 | -0.71 | -0.65 | -0.59 | -0.53 | -0.47 | -0.41 | -0.35 | -0.29 | -0.23 | -0.17 |
| WS <sub>2</sub> -1Zn-1 | -0.63 | -0.57 | -0.51 | -0.45 | -0.39 | -0.33 | -0.27 | -0.22 | -0.16 | -0.10 | -0.04 | 0.02  | 0.08  | 0.14  | 0.20  |
| WS <sub>2</sub> -1Zn-2 | 1.37  | 1.43  | 1.49  | 1.55  | 1.61  | 1.67  | 1.73  | 1.79  | 1.85  | 1.90  | 1.96  | 2.02  | 2.08  | 2.14  | 2.20  |
| WS <sub>2</sub> -2Zn-1 | -0.62 | -0.56 | -0.50 | -0.44 | -0.38 | -0.32 | -0.26 | -0.20 | -0.14 | -0.08 | -0.02 | 0.04  | 0.09  | 0.15  | 0.21  |
| WS <sub>2</sub> -2Zn-2 | 1.25  | 1.31  | 1.37  | 1.43  | 1.49  | 1.55  | 1.60  | 1.66  | 1.72  | 1.78  | 1.84  | 1.90  | 1.96  | 2.02  | 2.08  |
| WS <sub>2</sub> -3Zn-2 | 1.27  | 1.33  | 1.39  | 1.45  | 1.51  | 1.56  | 1.62  | 1.68  | 1.74  | 1.80  | 1.86  | 1.92  | 1.98  | 2.04  | 2.10  |
| WS <sub>2</sub> -1Fe-1 | -0.81 | -0.75 | -0.69 | -0.63 | -0.58 | -0.52 | -0.46 | -0.40 | -0.34 | -0.28 | -0.22 | -0.16 | -0.10 | -0.04 | 0.02  |
| WS <sub>2</sub> -1Fe-2 | 0.57  | 0.63  | 0.69  | 0.75  | 0.81  | 0.87  | 0.92  | 0.98  | 1.04  | 1.10  | 1.16  | 1.22  | 1.28  | 1.34  | 1.40  |
| WS <sub>2</sub> -2Fe-1 | -0.93 | -0.88 | -0.82 | -0.76 | -0.70 | -0.64 | -0.58 | -0.52 | -0.46 | -0.40 | -0.34 | -0.28 | -0.22 | -0.16 | -0.11 |
| WS <sub>2</sub> -2Fe-2 | 0.50  | 0.56  | 0.62  | 0.68  | 0.74  | 0.80  | 0.86  | 0.92  | 0.97  | 1.03  | 1.09  | 1.15  | 1.21  | 1.27  | 1.33  |
| WS <sub>2</sub> -3Fe-2 | 0.66  | 0.72  | 0.78  | 0.84  | 0.90  | 0.96  | 1.02  | 1.08  | 1.14  | 1.20  | 1.25  | 1.31  | 1.37  | 1.43  | 1.49  |
| WS <sub>2</sub> -1Co-1 | -0.83 | -0.77 | -0.71 | -0.65 | -0.59 | -0.53 | -0.47 | -0.41 | -0.35 | -0.29 | -0.24 | -0.18 | -0.12 | -0.06 | 0.00  |
| WS <sub>2</sub> -1Co-2 | 0.58  | 0.64  | 0.70  | 0.76  | 0.82  | 0.88  | 0.94  | 1.00  | 1.06  | 1.12  | 1.18  | 1.23  | 1.29  | 1.35  | 1.41  |
| WS <sub>2</sub> -2Co-1 | -0.85 | -0.79 | -0.73 | -0.67 | -0.61 | -0.55 | -0.49 | -0.43 | -0.37 | -0.31 | -0.26 | -0.20 | -0.14 | -0.08 | -0.02 |
| WS <sub>2</sub> -2Co-2 | 0.50  | 0.56  | 0.62  | 0.67  | 0.73  | 0.79  | 0.85  | 0.91  | 0.97  | 1.03  | 1.09  | 1.15  | 1.21  | 1.27  | 1.33  |
| WS <sub>2</sub> -3Co-2 | 0.68  | 0.74  | 0.79  | 0.85  | 0.91  | 0.97  | 1.03  | 1.09  | 1.15  | 1.21  | 1.27  | 1.33  | 1.39  | 1.45  | 1.51  |
| WS <sub>2</sub> -1Ni-1 | -0.90 | -0.84 | -0.78 | -0.72 | -0.66 | -0.60 | -0.54 | -0.48 | -0.42 | -0.36 | -0.31 | -0.25 | -0.19 | -0.13 | -0.07 |
| WS <sub>2</sub> -1Ni-2 | 0.81  | 0.87  | 0.93  | 0.99  | 1.05  | 1.10  | 1.16  | 1.22  | 1.28  | 1.34  | 1.40  | 1.46  | 1.52  | 1.58  | 1.64  |
| WS <sub>2</sub> -2Ni-1 | -0.82 | -0.76 | -0.70 | -0.64 | -0.58 | -0.52 | -0.46 | -0.40 | -0.34 | -0.28 | -0.23 | -0.17 | -0.11 | -0.05 | 0.01  |
| WS <sub>2</sub> -2Ni-2 | 0.93  | 0.99  | 1.04  | 1.10  | 1.16  | 1.22  | 1.28  | 1.34  | 1.40  | 1.46  | 1.52  | 1.58  | 1.64  | 1.70  | 1.76  |
| WS <sub>2</sub> -3Ni-2 | 0.84  | 0.90  | 0.96  | 1.02  | 1.08  | 1.14  | 1.20  | 1.26  | 1.32  | 1.38  | 1.44  | 1.49  | 1.55  | 1.61  | 1.67  |

**Table S8** Solvent corrected  $\Delta G_{corr}(CO^*)$  values (in eV) at different PH in the considered models

| Models                 | PH    |       |       |       |       |       |       |       |       |       |       |       |       |       |       |
|------------------------|-------|-------|-------|-------|-------|-------|-------|-------|-------|-------|-------|-------|-------|-------|-------|
|                        | 0     | 1     | 2     | 3     | 4     | 5     | 6     | 7     | 8     | 9     | 10    | 11    | 12    | 13    | 14    |
| WS <sub>2</sub>        | -1.25 | -1.19 | -1.13 | -1.07 | -1.02 | -0.96 | -0.90 | -0.84 | -0.78 | -0.72 | -0.66 | -0.60 | -0.54 | -0.48 | -0.42 |
| WS <sub>2</sub> -1Zn-1 | -1.29 | -1.23 | -1.17 | -1.11 | -1.05 | -0.99 | -0.93 | -0.87 | -0.81 | -0.76 | -0.70 | -0.64 | -0.58 | -0.52 | -0.46 |
| WS <sub>2</sub> -1Zn-2 | 0.95  | 1.01  | 1.07  | 1.13  | 1.19  | 1.25  | 1.31  | 1.37  | 1.42  | 1.48  | 1.54  | 1.60  | 1.66  | 1.72  | 1.78  |
| WS <sub>2</sub> -2Zn-1 | -0.61 | -0.55 | -0.49 | -0.44 | -0.38 | -0.32 | -0.26 | -0.20 | -0.14 | -0.08 | -0.02 | 0.04  | 0.10  | 0.16  | 0.22  |
| WS <sub>2</sub> -2Zn-2 | 0.96  | 1.02  | 1.08  | 1.14  | 1.20  | 1.26  | 1.32  | 1.37  | 1.43  | 1.49  | 1.55  | 1.61  | 1.67  | 1.73  | 1.79  |
| WS <sub>2</sub> -3Zn-2 | 0.78  | 0.84  | 0.90  | 0.96  | 1.02  | 1.08  | 1.14  | 1.20  | 1.26  | 1.32  | 1.38  | 1.43  | 1.49  | 1.55  | 1.61  |
| WS <sub>2</sub> -1Fe-1 | -1.60 | -1.54 | -1.48 | -1.43 | -1.37 | -1.31 | -1.25 | -1.19 | -1.13 | -1.07 | -1.01 | -0.95 | -0.89 | -0.83 | -0.77 |
| WS <sub>2</sub> -1Fe-2 | -0.79 | -0.73 | -0.67 | -0.61 | -0.55 | -0.49 | -0.43 | -0.37 | -0.31 | -0.25 | -0.20 | -0.14 | -0.08 | -0.02 | 0.04  |
| WS <sub>2</sub> -2Fe-1 | -1.03 | -0.97 | -0.91 | -0.85 | -0.79 | -0.73 | -0.67 | -0.61 | -0.55 | -0.49 | -0.43 | -0.37 | -0.32 | -0.26 | -0.20 |
| WS <sub>2</sub> -2Fe-2 | -1.01 | -0.95 | -0.89 | -0.83 | -0.77 | -0.71 | -0.66 | -0.60 | -0.54 | -0.48 | -0.42 | -0.36 | -0.30 | -0.24 | -0.18 |
| WS <sub>2</sub> -3Fe-2 | -0.56 | -0.51 | -0.45 | -0.39 | -0.33 | -0.27 | -0.21 | -0.15 | -0.09 | -0.03 | 0.03  | 0.09  | 0.15  | 0.21  | 0.26  |
| WS <sub>2</sub> -1Co-1 | -0.93 | -0.88 | -0.82 | -0.76 | -0.70 | -0.64 | -0.58 | -0.52 | -0.46 | -0.40 | -0.34 | -0.28 | -0.22 | -0.16 | -0.10 |
| WS <sub>2</sub> -1Co-2 | -0.53 | -0.48 | -0.42 | -0.36 | -0.30 | -0.24 | -0.18 | -0.12 | -0.06 | 0.00  | 0.06  | 0.12  | 0.18  | 0.24  | 0.29  |
| WS <sub>2</sub> -2Co-1 | -0.85 | -0.79 | -0.73 | -0.67 | -0.61 | -0.55 | -0.49 | -0.44 | -0.38 | -0.32 | -0.26 | -0.20 | -0.14 | -0.08 | -0.02 |
| WS <sub>2</sub> -2Co-2 | -0.70 | -0.64 | -0.58 | -0.52 | -0.46 | -0.40 | -0.34 | -0.28 | -0.23 | -0.17 | -0.11 | -0.05 | 0.01  | 0.07  | 0.13  |
| WS <sub>2</sub> -3Co-2 | -0.81 | -0.75 | -0.69 | -0.63 | -0.57 | -0.51 | -0.45 | -0.39 | -0.33 | -0.27 | -0.21 | -0.15 | -0.09 | -0.03 | 0.02  |
| WS <sub>2</sub> -1Ni-1 | -1.05 | -0.99 | -0.94 | -0.88 | -0.82 | -0.76 | -0.70 | -0.64 | -0.58 | -0.52 | -0.46 | -0.40 | -0.34 | -0.28 | -0.22 |
| WS <sub>2</sub> -1Ni-2 | 0.24  | 0.30  | 0.36  | 0.42  | 0.47  | 0.53  | 0.59  | 0.65  | 0.71  | 0.77  | 0.83  | 0.89  | 0.95  | 1.01  | 1.07  |
| WS <sub>2</sub> -2Ni-1 | -0.91 | -0.85 | -0.79 | -0.73 | -0.67 | -0.61 | -0.55 | -0.49 | -0.43 | -0.37 | -0.31 | -0.25 | -0.20 | -0.14 | -0.08 |
| WS <sub>2</sub> -2Ni-2 | 0.28  | 0.34  | 0.40  | 0.46  | 0.52  | 0.58  | 0.64  | 0.70  | 0.76  | 0.82  | 0.88  | 0.93  | 0.99  | 1.05  | 1.11  |
| WS <sub>2</sub> -3Ni-2 | 0.00  | 0.06  | 0.12  | 0.18  | 0.24  | 0.29  | 0.35  | 0.41  | 0.47  | 0.53  | 0.59  | 0.65  | 0.71  | 0.77  | 0.83  |



**Table S9** Solvent corrected  $U_L$  values (in V) at different PH in the considered models

| Models                 | PH    |       |       |       |       |       |       |       |       |       |       |       |       |       |       |
|------------------------|-------|-------|-------|-------|-------|-------|-------|-------|-------|-------|-------|-------|-------|-------|-------|
|                        | 0     | 1     | 2     | 3     | 4     | 5     | 6     | 7     | 8     | 9     | 10    | 11    | 12    | 13    | 14    |
| WS <sub>2</sub>        | -1.25 | -1.19 | -1.13 | -1.07 | -1.02 | -0.96 | -0.90 | -0.84 | -0.78 | -0.72 | -0.66 | -0.60 | -0.54 | -0.48 | -0.42 |
| WS <sub>2</sub> -1Zn-1 | -1.29 | -1.23 | -1.17 | -1.11 | -1.05 | -0.99 | -0.93 | -0.87 | -0.81 | -0.76 | -0.70 | -0.64 | -0.58 | -0.52 | -0.46 |
| WS <sub>2</sub> -1Zn-2 | -1.37 | -1.43 | -1.49 | -1.55 | -1.61 | -1.67 | -1.73 | -1.79 | -1.85 | -1.90 | -1.96 | -2.02 | -2.08 | -2.14 | -2.20 |
| WS <sub>2</sub> -2Zn-1 | -0.61 | -0.55 | -0.49 | -0.44 | -0.38 | -0.32 | -0.26 | -0.20 | -0.14 | -0.08 | -0.02 | -0.04 | -0.09 | -0.15 | -0.21 |
| WS <sub>2</sub> -2Zn-2 | -1.25 | -1.31 | -1.37 | -1.43 | -1.49 | -1.55 | -1.60 | -1.66 | -1.72 | -1.78 | -1.84 | -1.90 | -1.96 | -2.02 | -2.08 |
| WS <sub>2</sub> -3Zn-2 | -1.27 | -1.33 | -1.39 | -1.45 | -1.51 | -1.56 | -1.62 | -1.68 | -1.74 | -1.80 | -1.86 | -1.92 | -1.98 | -2.04 | -2.10 |
| WS <sub>2</sub> -1Fe-1 | -1.60 | -1.54 | -1.48 | -1.43 | -1.37 | -1.31 | -1.25 | -1.19 | -1.13 | -1.07 | -1.01 | -0.95 | -0.89 | -0.83 | -0.77 |
| WS <sub>2</sub> -1Fe-2 | -0.79 | -0.73 | -0.69 | -0.75 | -0.81 | -0.87 | -0.92 | -0.98 | -1.04 | -1.10 | -1.16 | -1.22 | -1.28 | -1.34 | -1.40 |
| WS <sub>2</sub> -2Fe-1 | -1.03 | -0.97 | -0.91 | -0.85 | -0.79 | -0.73 | -0.67 | -0.61 | -0.55 | -0.49 | -0.43 | -0.37 | -0.32 | -0.26 | -0.20 |
| WS <sub>2</sub> -2Fe-2 | -1.01 | -0.95 | -0.89 | -0.83 | -0.77 | -0.80 | -0.86 | -0.92 | -0.97 | -1.03 | -1.09 | -1.15 | -1.21 | -1.27 | -1.33 |
| WS <sub>2</sub> -3Fe-2 | -0.66 | -0.72 | -0.78 | -0.84 | -0.90 | -0.96 | -1.02 | -1.08 | -1.14 | -1.20 | -1.25 | -1.31 | -1.37 | -1.43 | -1.49 |
| WS <sub>2</sub> -1Co-1 | -0.93 | -0.88 | -0.82 | -0.76 | -0.70 | -0.64 | -0.58 | -0.52 | -0.46 | -0.40 | -0.34 | -0.28 | -0.22 | -0.16 | -0.10 |
| WS <sub>2</sub> -1Co-2 | -0.58 | -0.64 | -0.70 | -0.76 | -0.82 | -0.88 | -0.94 | -1.00 | -1.06 | -1.12 | -1.18 | -1.23 | -1.29 | -1.35 | -1.41 |
| WS <sub>2</sub> -2Co-1 | -0.85 | -0.79 | -0.73 | -0.67 | -0.61 | -0.55 | -0.49 | -0.44 | -0.38 | -0.32 | -0.26 | -0.20 | -0.14 | -0.08 | -0.02 |
| WS <sub>2</sub> -2Co-2 | -0.70 | -0.64 | -0.62 | -0.67 | -0.73 | -0.79 | -0.85 | -0.91 | -0.97 | -1.03 | -1.09 | -1.15 | -1.21 | -1.27 | -1.33 |
| WS <sub>2</sub> -3Co-2 | -0.81 | -0.75 | -0.79 | -0.85 | -0.91 | -0.97 | -1.03 | -1.09 | -1.15 | -1.21 | -1.27 | -1.33 | -1.39 | -1.45 | -1.51 |
| WS <sub>2</sub> -1Ni-1 | -1.05 | -0.99 | -0.94 | -0.88 | -0.82 | -0.76 | -0.70 | -0.64 | -0.58 | -0.52 | -0.46 | -0.40 | -0.34 | -0.28 | -0.22 |
| WS <sub>2</sub> -1Ni-2 | -0.81 | -0.87 | -0.93 | -0.99 | -1.05 | -1.10 | -1.16 | -1.22 | -1.28 | -1.34 | -1.40 | -1.46 | -1.52 | -1.58 | -1.64 |
| WS <sub>2</sub> -2Ni-1 | -0.91 | -0.85 | -0.79 | -0.73 | -0.67 | -0.61 | -0.55 | -0.49 | -0.43 | -0.37 | -0.31 | -0.25 | -0.20 | -0.14 | -0.08 |
| WS <sub>2</sub> -2Ni-2 | -0.93 | -0.99 | -1.04 | -1.10 | -1.16 | -1.22 | -1.28 | -1.34 | -1.40 | -1.46 | -1.52 | -1.58 | -1.64 | -1.70 | -1.76 |
| WS <sub>2</sub> -3Ni-2 | -0.84 | -0.90 | -0.96 | -1.02 | -1.08 | -1.14 | -1.20 | -1.26 | -1.32 | -1.38 | -1.44 | -1.49 | -1.55 | -1.61 | -1.67 |

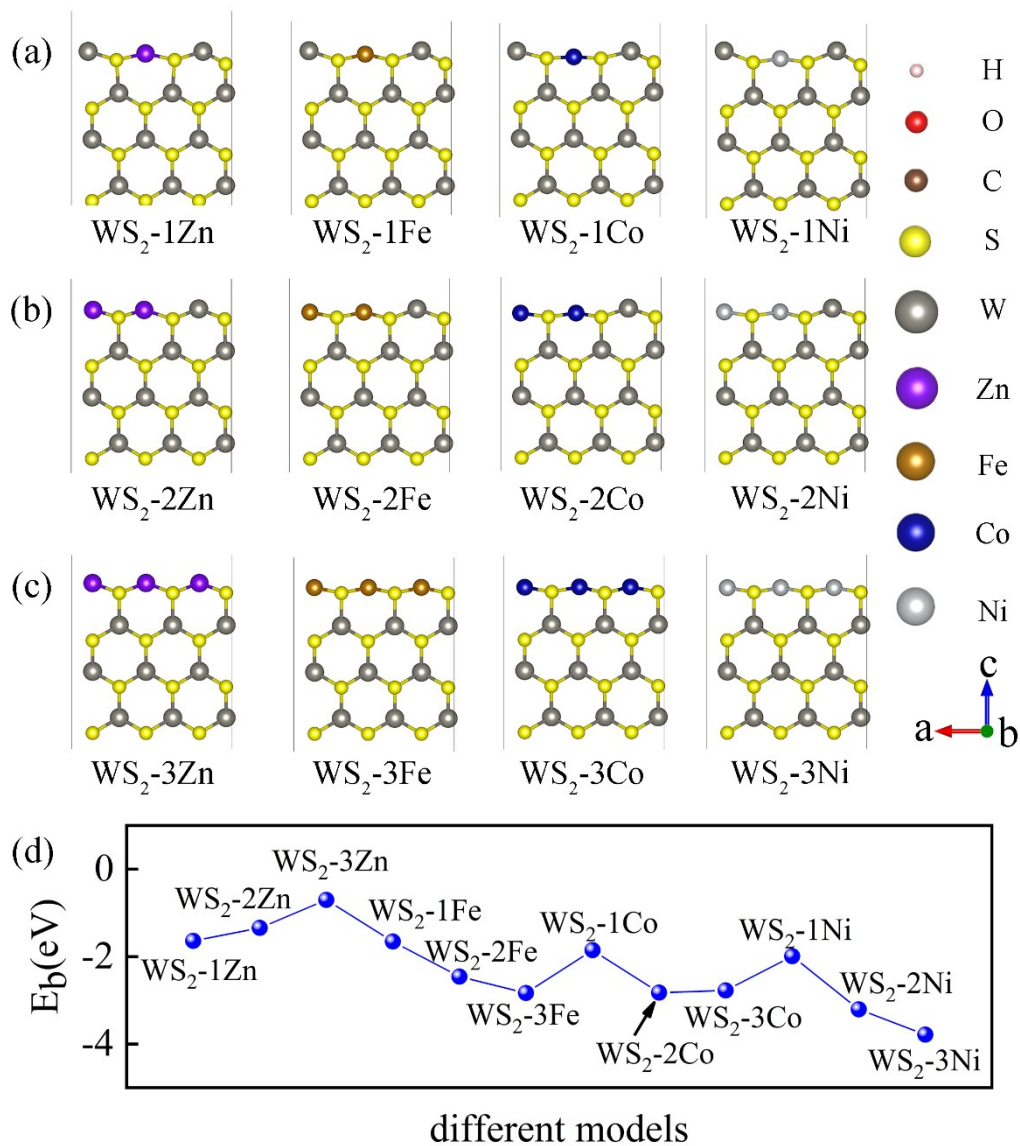

**Figure S1** Optimized stable structures of (a) WS<sub>2</sub>-1TM models, (b) WS<sub>2</sub>-2TM models and (c) WS<sub>2</sub>-3TM models. (d) Binding energy of WS<sub>2</sub>-xTM. The binding energy ( $E_b$ ) is calculated by the following formula:  $E_b = E(\text{WS}_2\text{-xTM}) - \mu_{\text{TM}} - E(\text{WS}_2\text{-V}_W)$ , where  $E(\text{WS}_2\text{-xTM})$  and  $E(\text{WS}_2\text{-V}_W)$  are the energy of WS<sub>2</sub>-xTM model and the energy of WS<sub>2</sub> with W vacancy, respectively, and  $\mu_{\text{TM}}$  is the energy of each TM atom in its bulk phase.

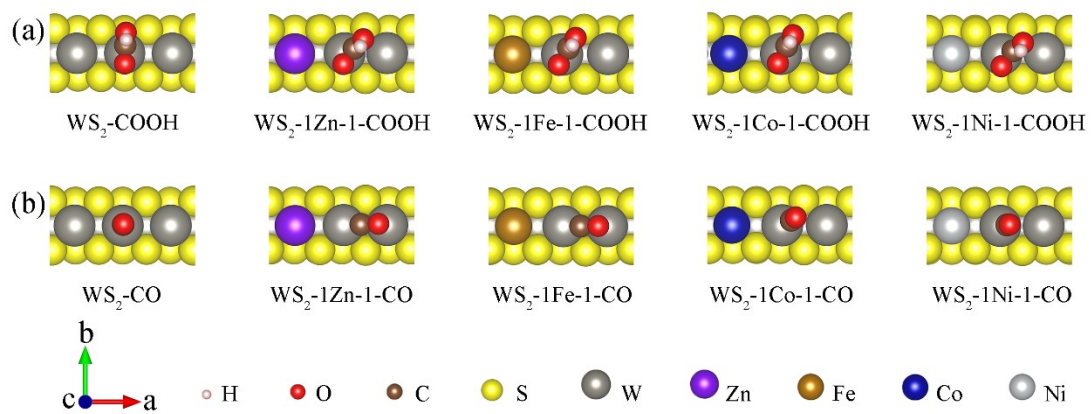

**Figure S2** Stable structures of  $\text{WS}_2$  and  $\text{WS}_2$ -1TM-1 models absorbed with reaction intermediates

(a)  $\text{COOH}^*$  and (b)  $\text{CO}^*$ , respectively

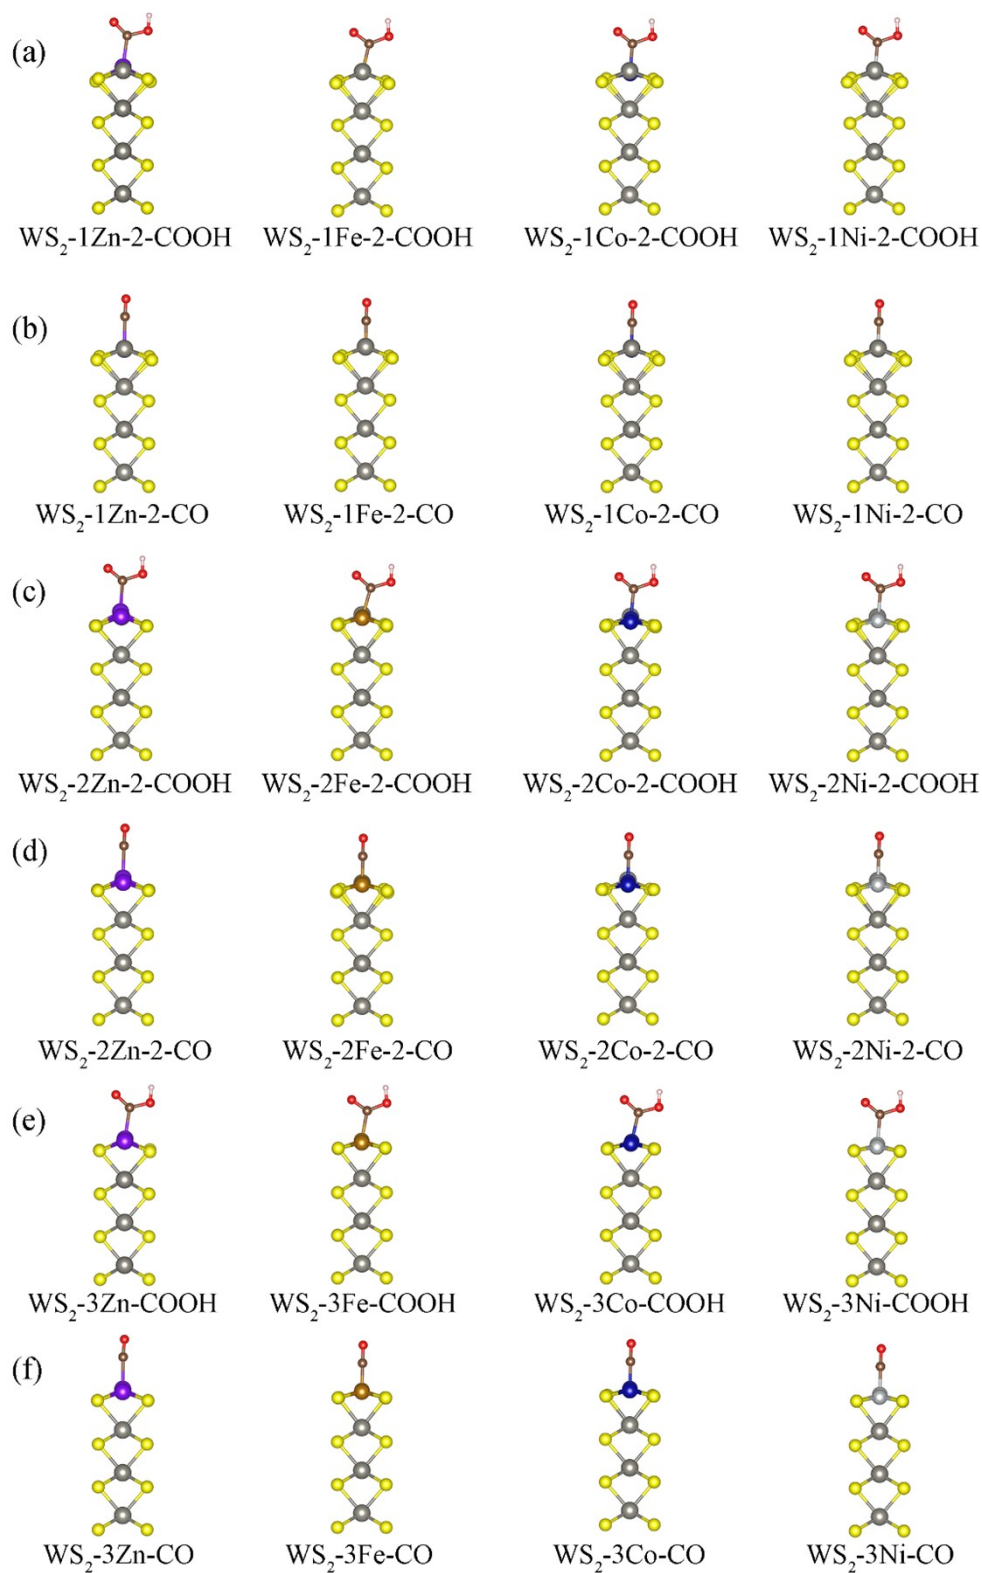

**Figure S3** Stable structures of  $WS_2-1TM-2$  models absorbed with reaction intermediates (a)  $COOH^*$  and (b)  $CO^*$ , respectively; stable structures of  $WS_2-2TM-2$  models absorbed with reaction intermediates (c)  $COOH^*$  and (d)  $CO^*$ , respectively; and stable structures of  $WS_2-3TM$  models absorbed with reaction intermediates (e)  $COOH^*$  and (f)  $CO^*$ , respectively

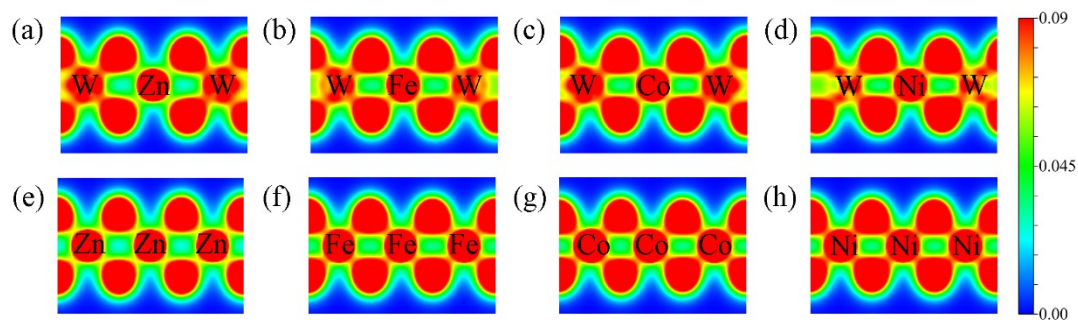

**Figure S4** Charge density for (a) WS<sub>2</sub>-1Zn, (b) WS<sub>2</sub>-1Fe, (c) WS<sub>2</sub>-1Co, (d) WS<sub>2</sub>-1Ni, (e) WS<sub>2</sub>-3Zn, (f) WS<sub>2</sub>-3Fe, (g) WS<sub>2</sub>-3Co and (h) WS<sub>2</sub>-3Ni models.

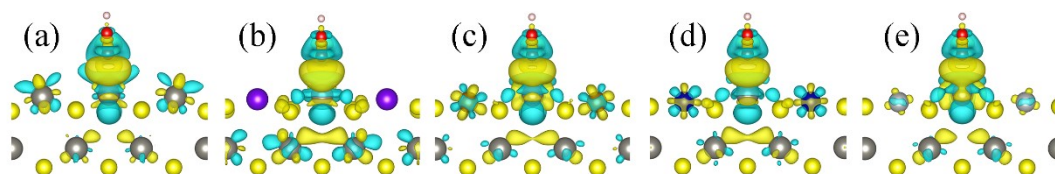

**Figure S5** The side view of charge density difference for the adsorption of COOH\* on (a) bare WS<sub>2</sub>, (b) WS<sub>2</sub>-2Zn-1, (c) WS<sub>2</sub>-2Fe-1, (d) WS<sub>2</sub>-2Co-1 and (e) WS<sub>2</sub>-2Ni-1 models. The charge accumulation/depletion is shown in yellow/cyan with the isosurface of  $0.002 \text{ e}/\text{\AA}^3 \cdot \text{c}$ . The gray, blue, yellow, brown, red and white balls in the ball-and-stick models represent the W, Zn, S, C, O and H atoms, respectively.

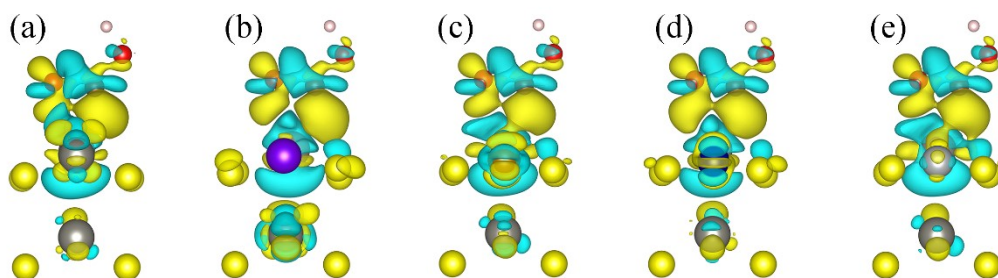

**Figure S6** The main view of charge density difference for the adsorption of COOH\* on (a) bare WS<sub>2</sub>, (b) WS<sub>2</sub>-2Zn-1, (c) WS<sub>2</sub>-2Fe-1, (d) WS<sub>2</sub>-2Co-1 and (e) WS<sub>2</sub>-2Ni-1 models. The charge accumulation/depletion is shown in yellow/cyan with the isosurface of  $0.002 \text{ e}/\text{\AA}^3 \cdot \text{c}$ . The gray, blue, yellow, brown, red and white balls in the ball-and-stick models represent the W, Zn, S, C, O and H atoms, respectively.

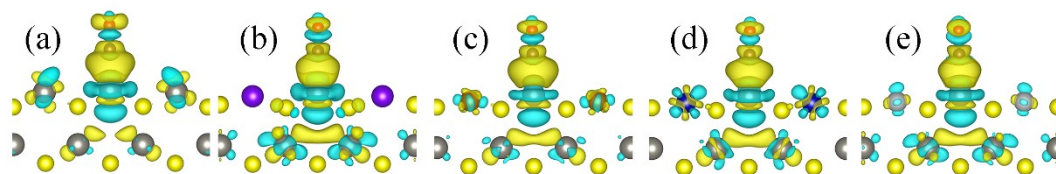

**Figure S7** The side view of charge density difference for the adsorption of CO\* on (a) bare WS<sub>2</sub>, (b) WS<sub>2</sub>-2Zn-1, (c) WS<sub>2</sub>-2Fe-1, (d) WS<sub>2</sub>-2Co-1 and (e) WS<sub>2</sub>-2Ni-1 models. The charge accumulation/depletion is shown in yellow/cyan with the isosurface of 0.002 e/Å<sup>3</sup> · c. The gray, blue, yellow, brown, red and white balls in the ball-and-stick models represent the W, Zn, S, C, O and H atoms, respectively.

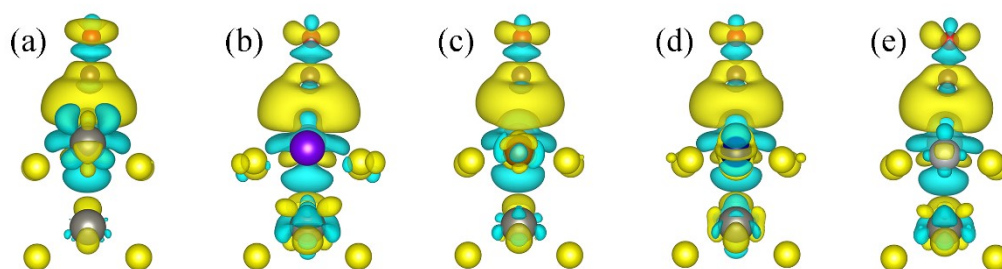

**Figure S8** The main view of charge density difference for the adsorption of CO\* on (a) bare WS<sub>2</sub>, (b) WS<sub>2</sub>-2Zn-1, (c) WS<sub>2</sub>-2Fe-1, (d) WS<sub>2</sub>-2Co-1 and (e) WS<sub>2</sub>-2Ni-1 models. The charge accumulation/depletion is shown in yellow/cyan with the isosurface of 0.002 e/Å<sup>3</sup> · c. The gray, blue, yellow, brown, red and white balls in the ball-and-stick models represent the W, Zn, S, C, O and H atoms, respectively.



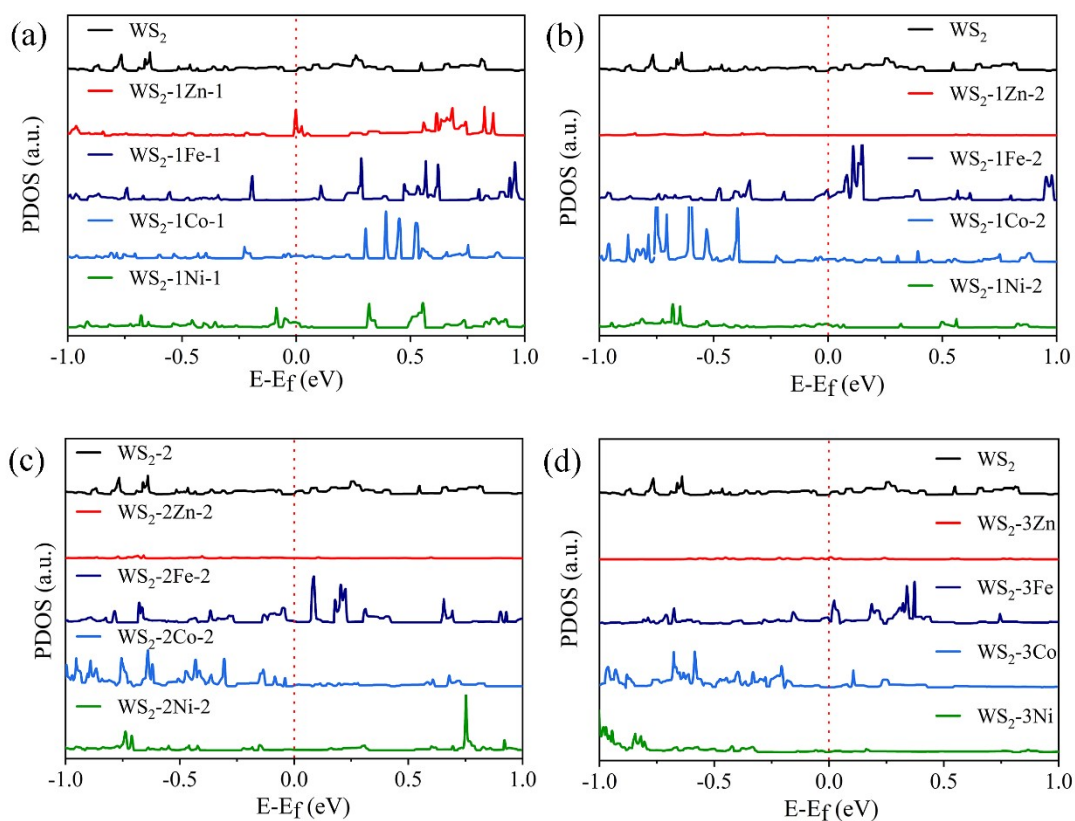

**Figure S9** Projected state density of d-orbit of adsorption site in (a)  $\text{WS}_2$ -1TM-1, (b)  $\text{WS}_2$ -1TM-2, (c)  $\text{WS}_2$ -2TM-2, and (d)  $\text{WS}_2$ -3TM models.

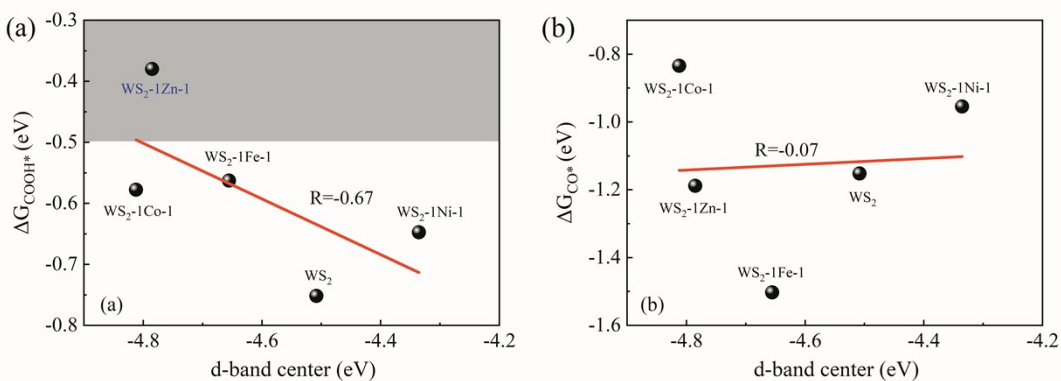

**Figure S10** Relationship between the Gibbs free energy change and d-band centers of W sites in  $\text{WS}_2$ -1TM models in the case of absorption intermediate (a)  $\text{COOH}^*$  and (b)  $\text{CO}^*$ , respectively. The R shows the correlation between Gibbs free energy and d-band centers. The gray region indicates the models with better electrocatalytic performance ( $-0.5 < \Delta G < 0.5$  eV).

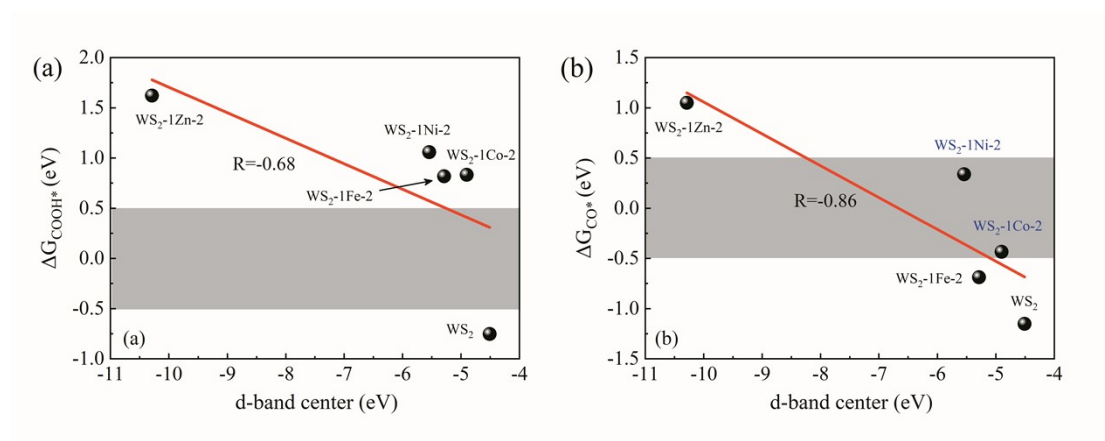

**Figure S11** Relationship between the Gibbs free energy change and d-band centers of TM sites in WS<sub>2</sub>-1TM models in the case of absorption intermediate (a) COOH\* and (b) CO\*, respectively. The R shows the correlation between Gibbs free energy and d-band centers. The gray region indicates the models with better electrocatalytic performance ( $-0.5 < \Delta G < 0.5$  eV).

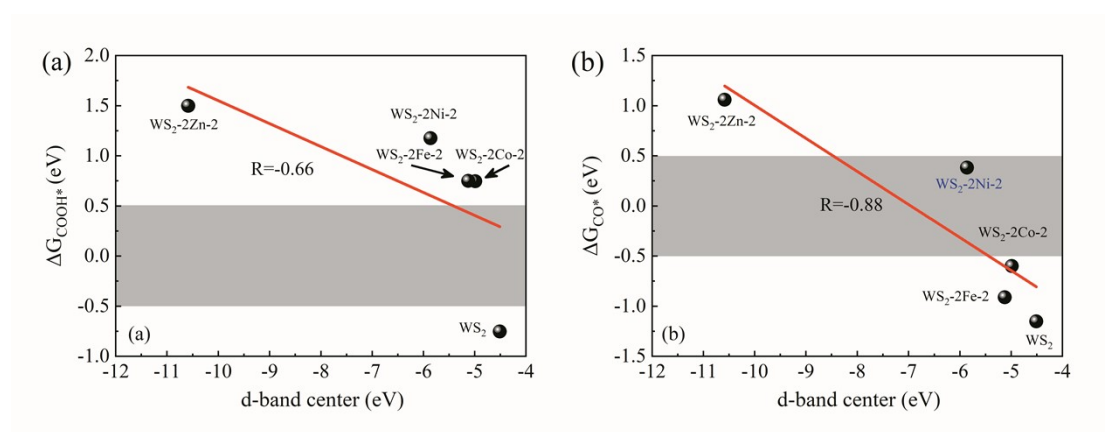

**Figure S12** Relationship between the Gibbs free energy change and d-band centers of TM sites in WS<sub>2</sub>-2TM models in the case of absorption intermediate (a) COOH\* and (b) CO\*, respectively. The R shows the correlation between Gibbs free energy and d-band centers. The gray region indicates the models with better electrocatalytic performance ( $-0.5 < \Delta G < 0.5$  eV).



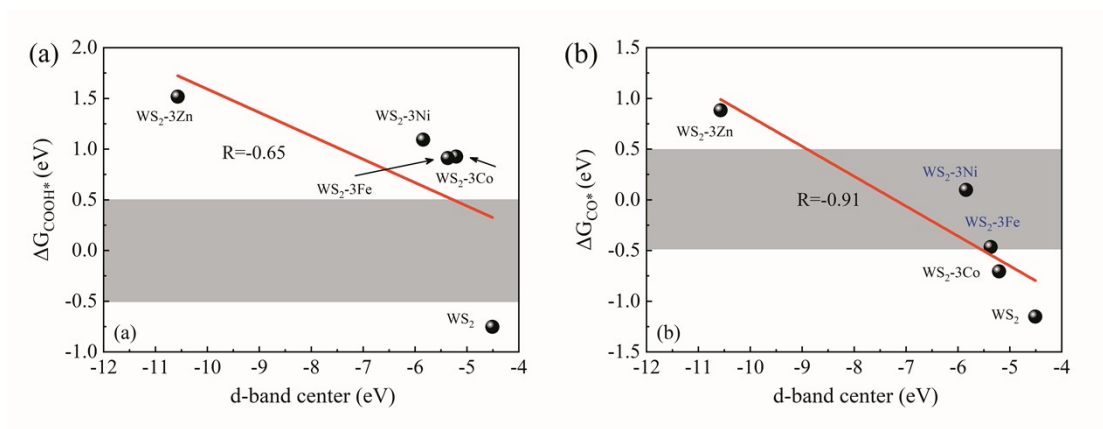

**Figure S13** Relationship between the Gibbs free energy change and d-band centers of TM sites in  $WS_2$ -3TM models in the case of absorption intermediate (a)  $COOH^*$  and (b)  $CO^*$ , respectively. The R shows the correlation between Gibbs free energy and d-band centers. The gray region indicates the models with better electrocatalytic performance ( $-0.5 < \Delta G < 0.5$  eV).

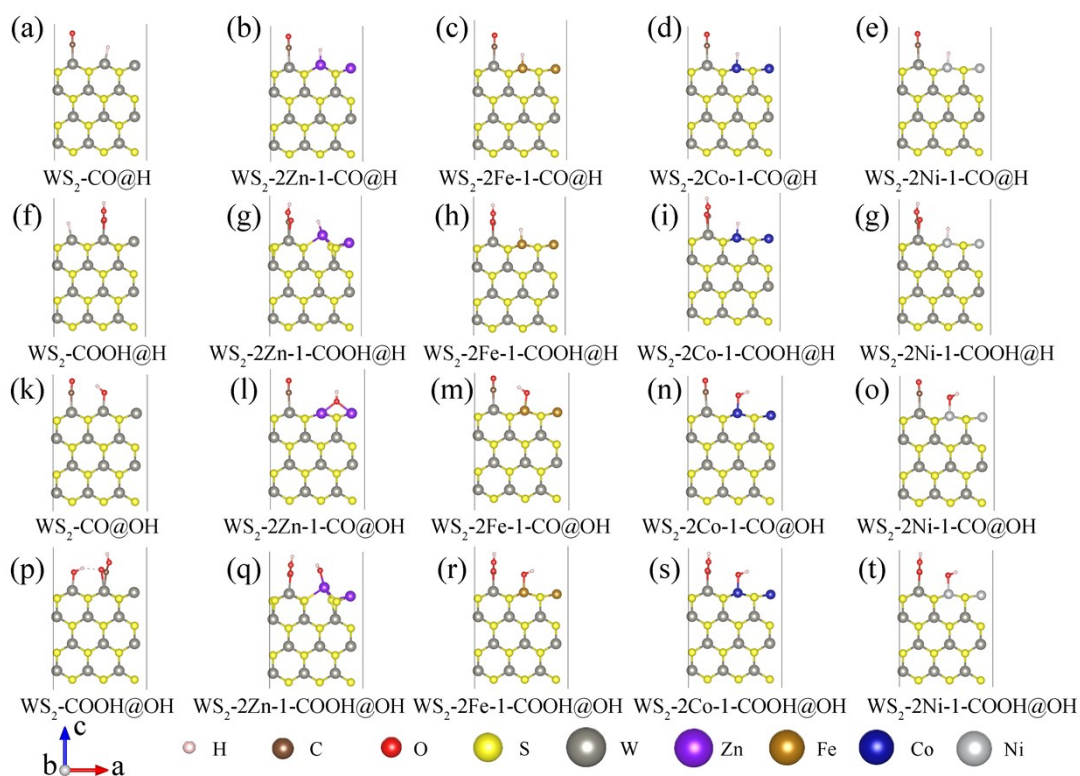

**Figure S14** Stable structures of (a)  $WS_2$ , (b)  $WS_2-2Zn-1$ , (c)  $WS_2-2Fe-1$ , (d)  $WS_2-2Co-1$  and (e)  $WS_2-2Ni-1$  models absorbed with reaction intermediates  $CO^*$  and  $H^*$ , respectively. Stable structures of (f)  $WS_2$ , (g)  $WS_2-2Zn-1$ , (h)  $WS_2-2Fe-1$ , (i)  $WS_2-2Co-1$  and (j)  $WS_2-2Ni-1$  models absorbed with reaction intermediates  $COOH^*$  and  $H^*$ , respectively. Stable structures of (k)  $WS_2$ ,

(l) WS<sub>2</sub>-2Zn-1, (m) WS<sub>2</sub>-2Fe-1, (n) WS<sub>2</sub>-2Co-1 and (o) WS<sub>2</sub>-2Ni-1 models absorbed with reaction intermediates CO\* and OH\*, respectively. Stable structures of (p) WS<sub>2</sub>, (q) WS<sub>2</sub>-2Zn-1, (r) WS<sub>2</sub>-2Fe-1, (s) WS<sub>2</sub>-2Co-1 and (t) WS<sub>2</sub>-2Ni-1 models absorbed with reaction intermediates COOH\* and OH\*, respectively.

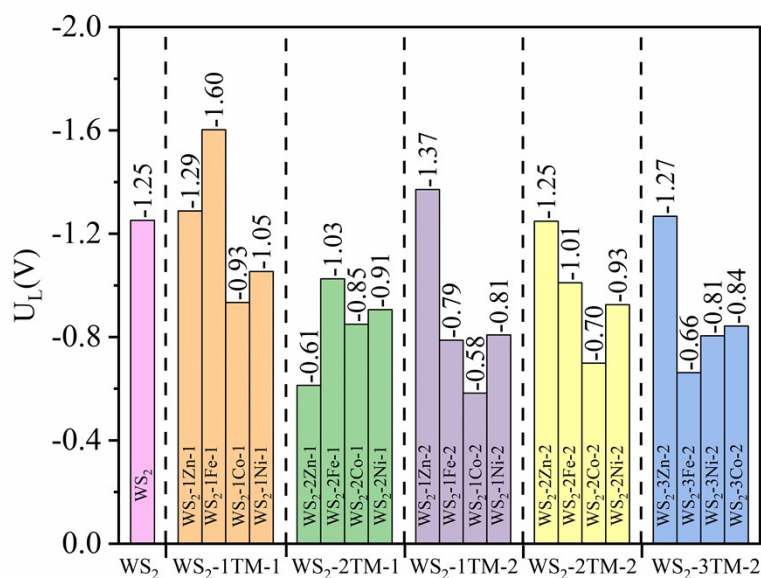

**Figure S15** The calculated values of limiting potential ( $U_L$ ) after solvation modification for the CO<sub>2</sub>RR to CO on different models at PH=0.

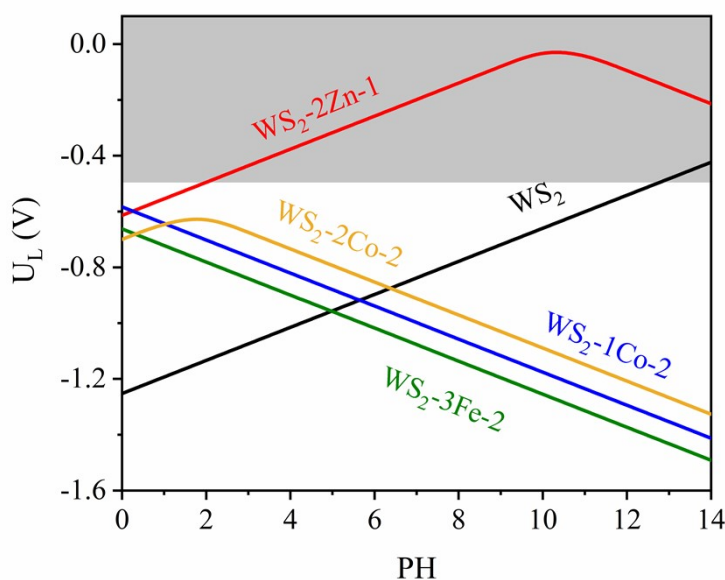

**Figure S16** The calculated values of limiting potential ( $U_L$ ) after solvation modification for the CO<sub>2</sub>RR to CO on WS<sub>2</sub>, WS<sub>2</sub>-1Co-2, WS<sub>2</sub>-2Co-2, WS<sub>2</sub>-2Zn-1 and WS<sub>2</sub>-3Fe-2 models at different PH.

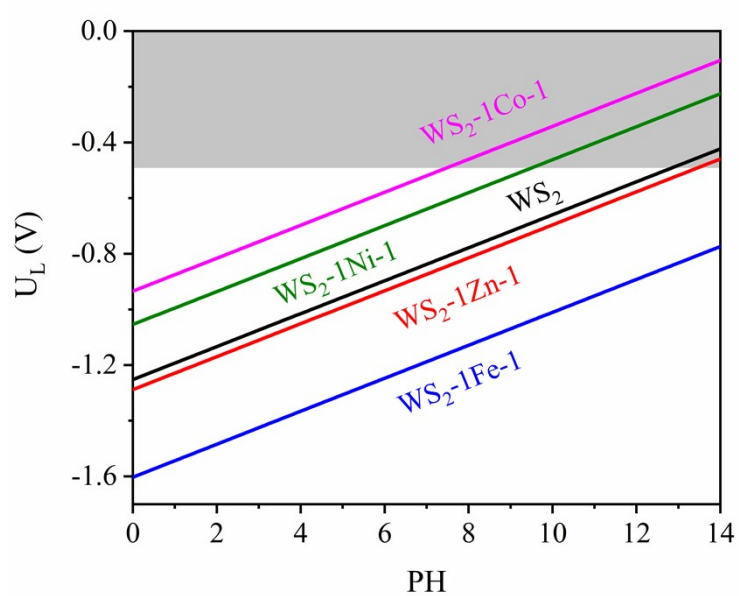

**Figure S17** The calculated values of limiting potential ( $U_L$ ) after solvation modification for the CO<sub>2</sub>RR to CO on WS<sub>2</sub>-1TM-1 models at different PH.

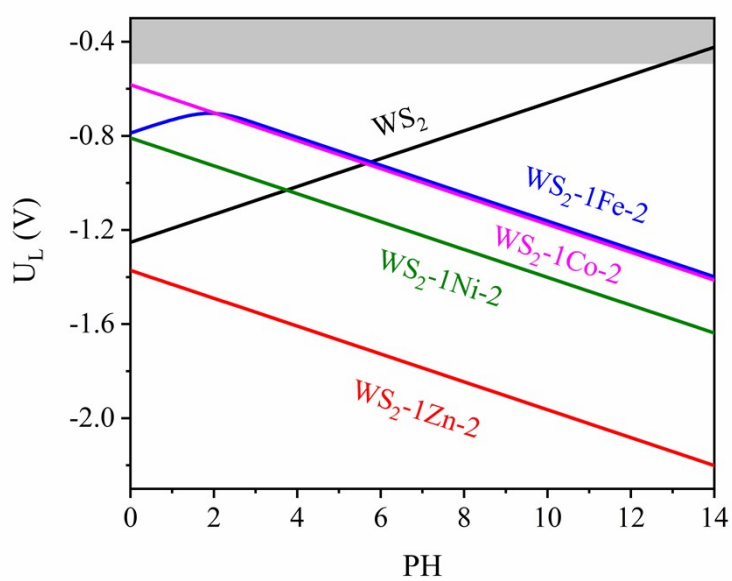

**Figure S18** The calculated values of limiting potential ( $U_L$ ) after solvation modification for the CO<sub>2</sub>RR to CO on WS<sub>2</sub>-1TM-2 models at different PH.

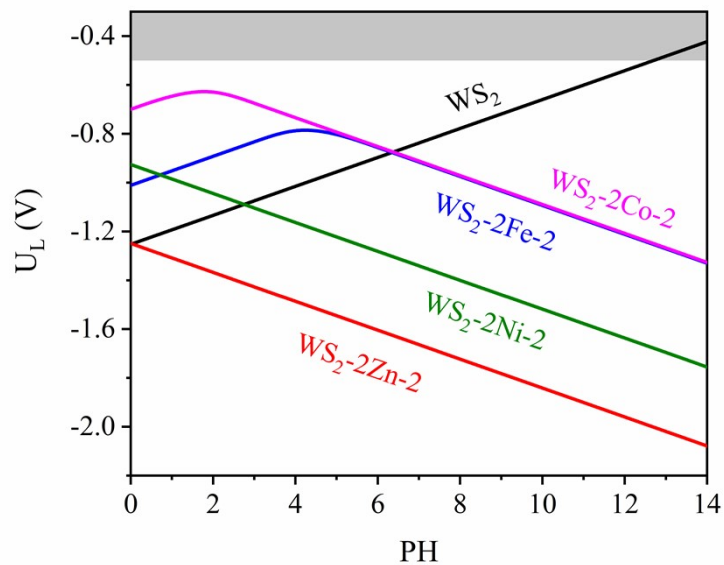

**Figure S19** The calculated values of limiting potential ( $U_L$ ) after solvation modification for the  $\text{CO}_2\text{RR}$  to  $\text{CO}$  on  $\text{WS}_2\text{-2TM-2}$  models at different pH.

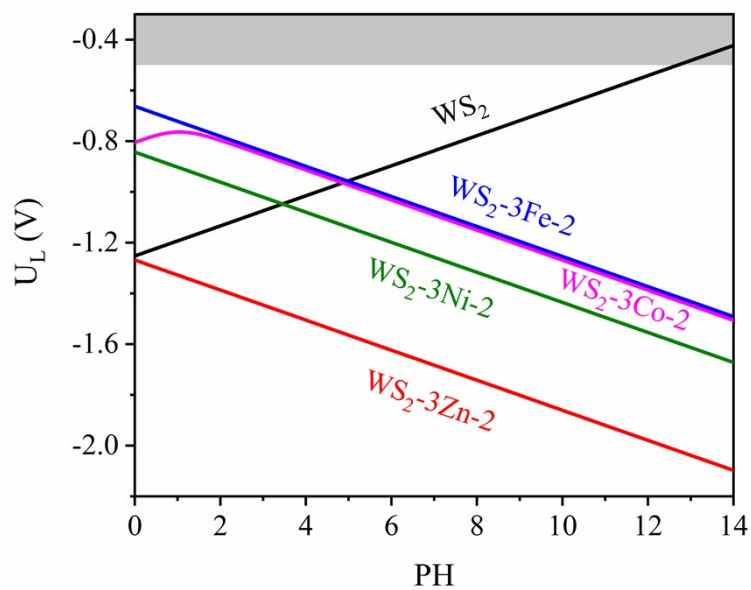

**Figure S20** The calculated values of limiting potential ( $U_L$ ) after solvation modification for the  $\text{CO}_2\text{RR}$  to  $\text{CO}$  on  $\text{WS}_2\text{3TM-2}$  models at different pH.

## Reference

1. P. Prslja and N. López, *ACS Catalysis*, 2021, **11**, 88-94.
2. A. A. Peterson and J. K. Nørskov, *The Journal of Physical Chemistry Letters*, 2012, **3**, 251-258.
3. M. Asadi, K. Kim, C. Liu, A. V. Ad Depalli, P. Abbasi, P. Yasaei, P. Phillips, A. Behranginia, J. M. Cerrato and R. Haasch, *Science*, 2016, **353**, 467.
4. P. Abbasi, M. Asadi, C. Liu, S. Sharifi-Asl, B. Sayahpour, A. Behranginia, P. Zapol, R. Shahbazian-Yassar, L. A. Curtiss and A. Salehi-Khojin, *Acs Nano*, 2017, **11**, 453-460.
